# Supplementary material for: Stochastic tissue environment expands spatial limits of synaptic and astrocytic glutamate actions
Source: Research Square preprint supplement (doi:10.21203/rs.3.rs-6066377/v1), 2025-05-28
Supplement: Supplementary file 1 [file d6ed6ec7f0d43cfefb9a22c5.pdf]

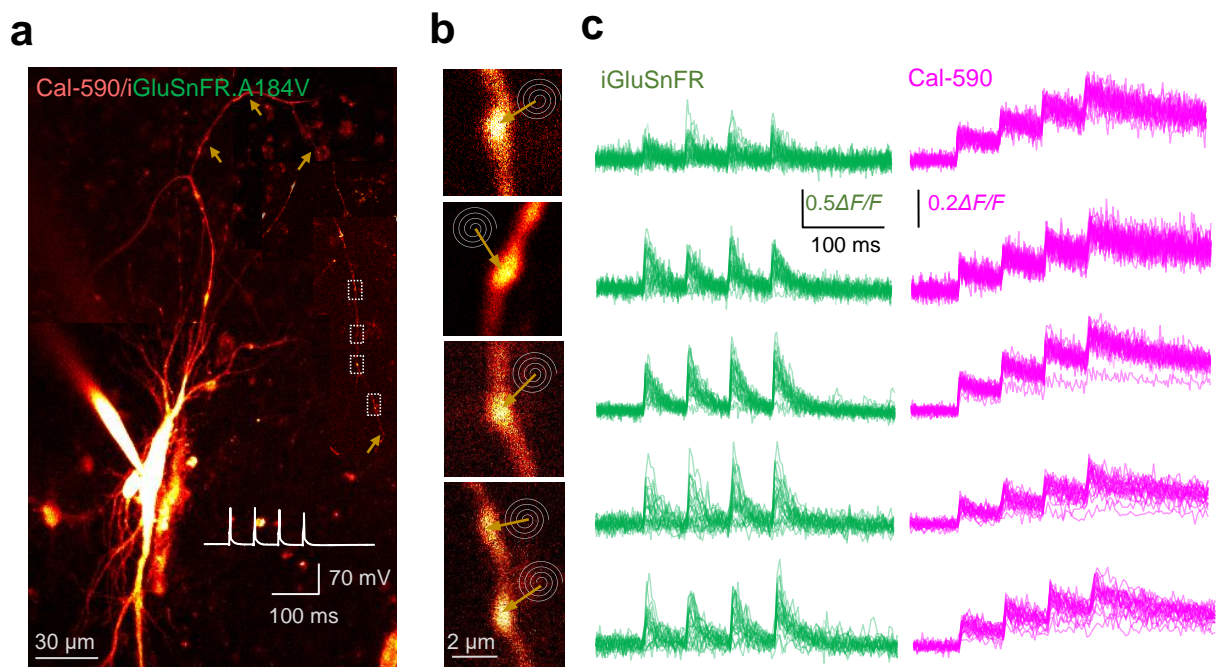

**Supplementary Figure 1. Documenting the profile of glutamate escape at individual presynaptic boutons of CA3 pyramidal cells.**

**(a)** CA3 pyramidal cell (organotypic hippocampal slice) expressing SF-iGluSnFR.A184V and dialysed whole-cell with Cal-590 and 4  $\mu\text{M}$  Alexa-594, with 4 ROIs along the axon (arrowheads, dotted rectangles; collage of 8-17  $\mu\text{m}$  deep image stack projections); inset trace, four action potentials 50 ms apart elicited at the soma in current-clamp.

**(b)** Presynaptic axonal boutons (ROIs shown in **a**); spirals and arrows, Tornado scan positions.

**(c)** Fluorescence time course; integrated Tornado scan signal, 500hz sampling rate in iGluSnFR (green) and Cal-590 (magenta) channels ( $\lambda_{x^{2P}}=910\text{ nm}$ ), in response to four action potentials 50 ms apart, as indicated, for the boutons in **b**; 20-24 trials shown.

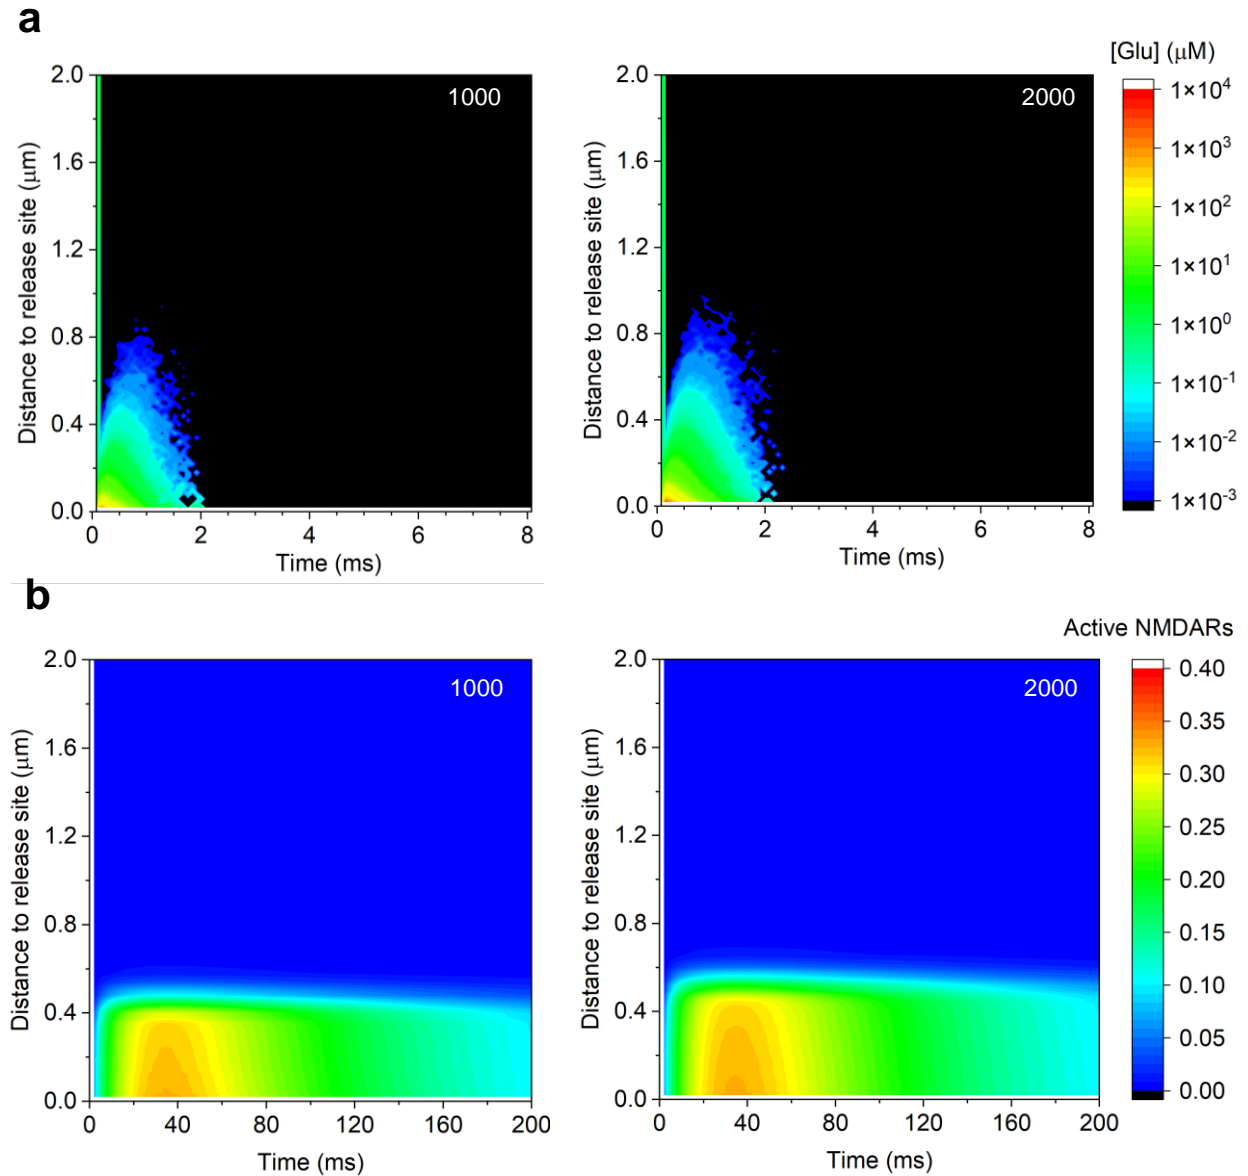

**Supplementary Figure 2. Concentration profile of free glutamate and NMDA receptor activation following synaptic release, with transporters distributed across neuropil.**

**(a)** The spatiotemporal dynamics of the free glutamate concentration in simulation experiments illustrated in Fig. 2a, with 1000 (*left*) or 2000 (*right*) molecules released, as indicated.

**(b)** The spatiotemporal dynamics of NMDA receptor activation, assuming no  $\text{Mg}^{2+}$  block, computed based on the free glutamate dynamics as shown in **a**, with the corresponding numbers of molecules released, as indicated; see Methods for further detail.

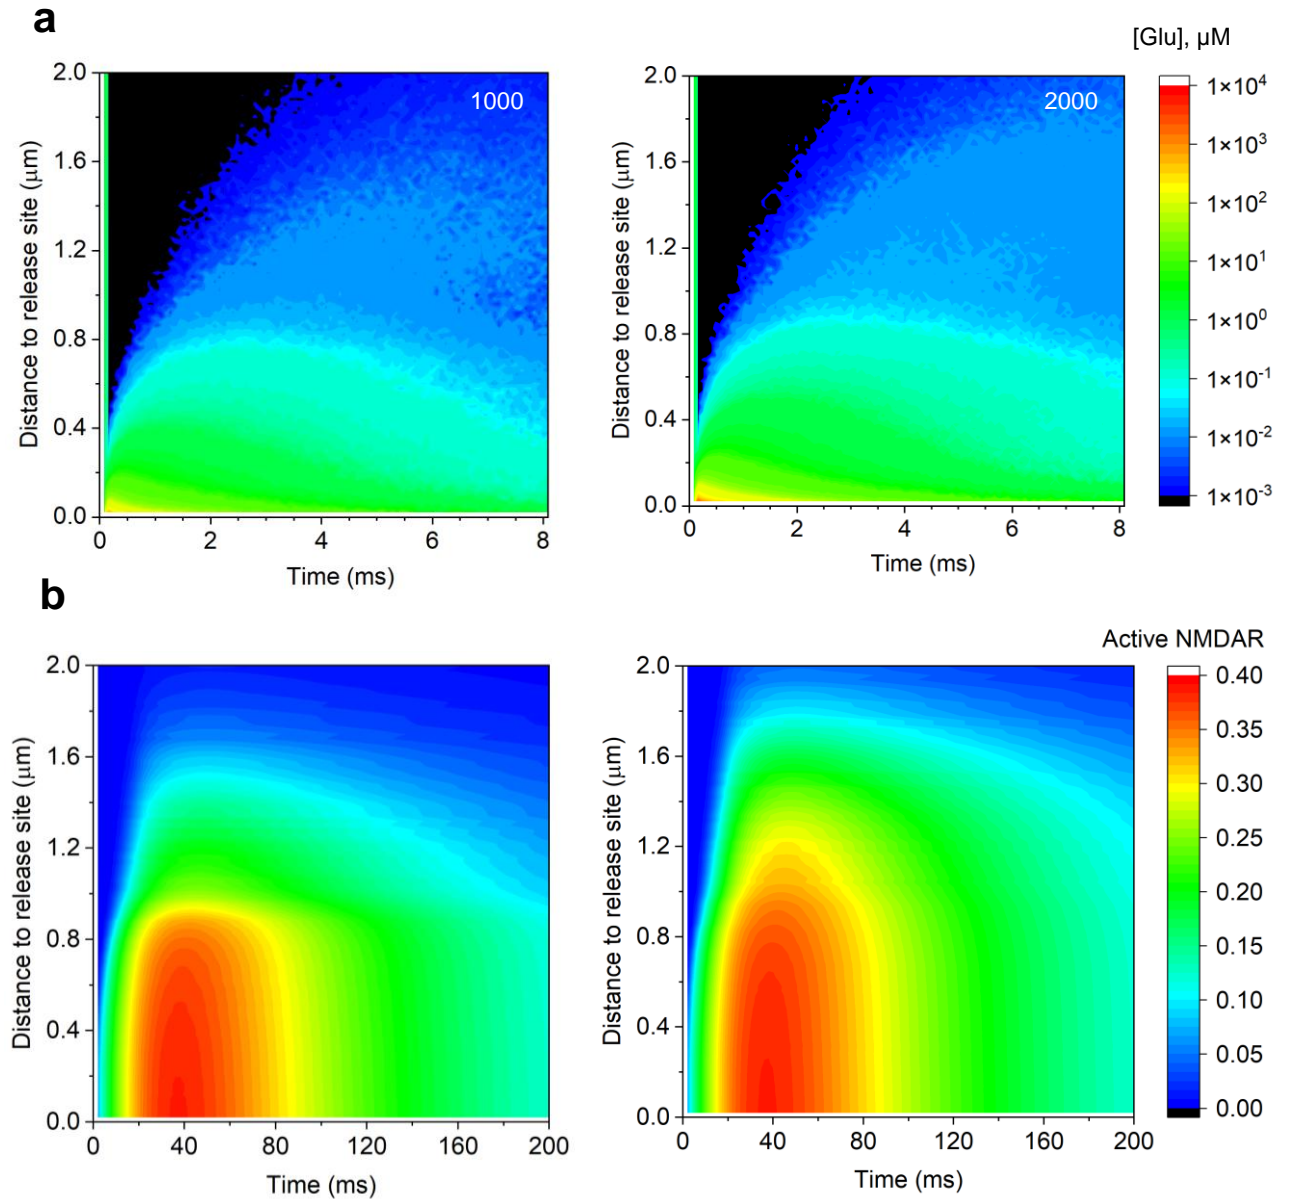

**Supplementary Figure 3. Concentration profile of free glutamate and NMDA receptor activation following synaptic release, with transporters concentrated on astrocyte surfaces.**

**(a)** The spatiotemporal dynamics of the free glutamate concentration in simulation experiments illustrated in Fig. 2d, with 1000 (*left*) or 2000 (*right*) molecules released, as indicated.

**(b)** The spatiotemporal dynamics of NMDA receptor activation, assuming no  $Mg^{2+}$  block, computed based on the free glutamate dynamics as shown in **a**, with the corresponding numbers of molecules released, as indicated; see Methods for further detail.
